# Supplementary material
Source: Springer Nature journal article supplement (https://www.springermedizin.de/resource/supplementary/12245_2010_34_MOESM2_ESM.pdf/9672626)

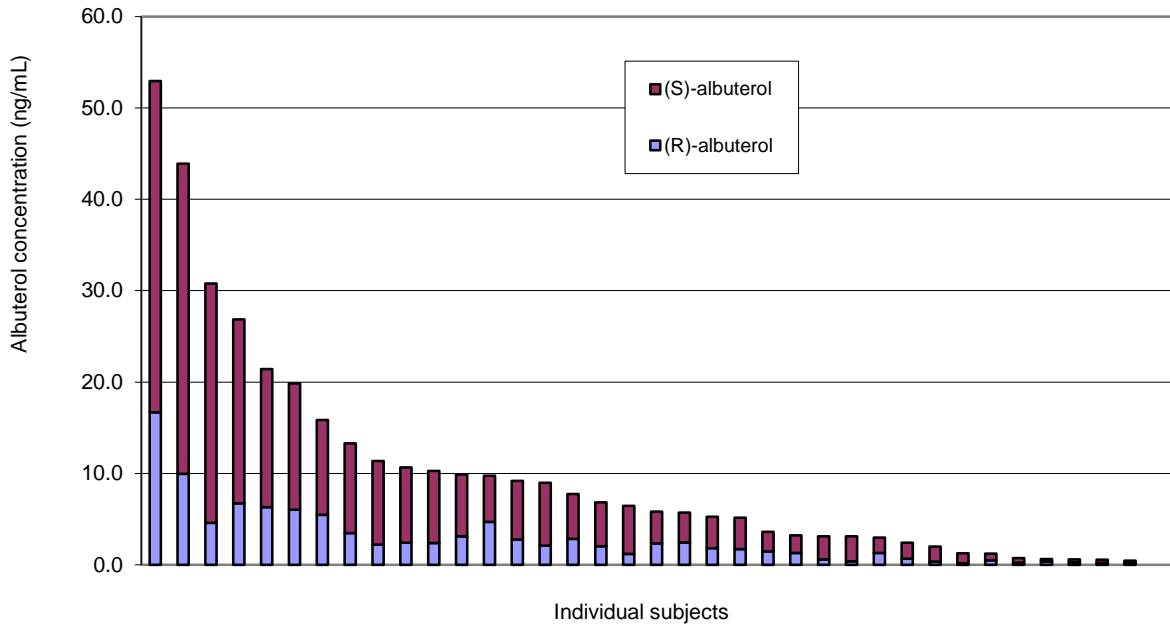

Supplement: MOESM2 [file 9672626]
